# Supplementary material for: Giant electrostrictive effect in lead-free barium titanate-based ceramicsviaA-site ion-pairs engineering
Source: Royal Society of Chemistry journal article supplement (doi:10.1039/c9ta05681e), 2019-01-01
Supplement: c9ta05681e1.pdf [file c9ta05681e1.pdf]

*Supporting Materials*

**Giant electrostrictive effect in lead-free barium titanate-based ceramics via A-site ion-pairs engineering**

Yanli Huang<sup>1</sup>, Chunlin Zhao<sup>1</sup>, Jie Yin<sup>1</sup>, Xiang Lv<sup>1</sup>, Jian Ma<sup>2</sup> and Jiagang Wu<sup>1,\*</sup>

*1 Department of Materials Science, Sichuan University, Chengdu, 610064, China*

*2 Physics Department, Sichuan Province Key Laboratory of Information Materials, Southwest Minzu University, Chengdu 610041, China*

\* Corresponding author: wujiagang0208@163.com and msewujg@scu.edu.cn

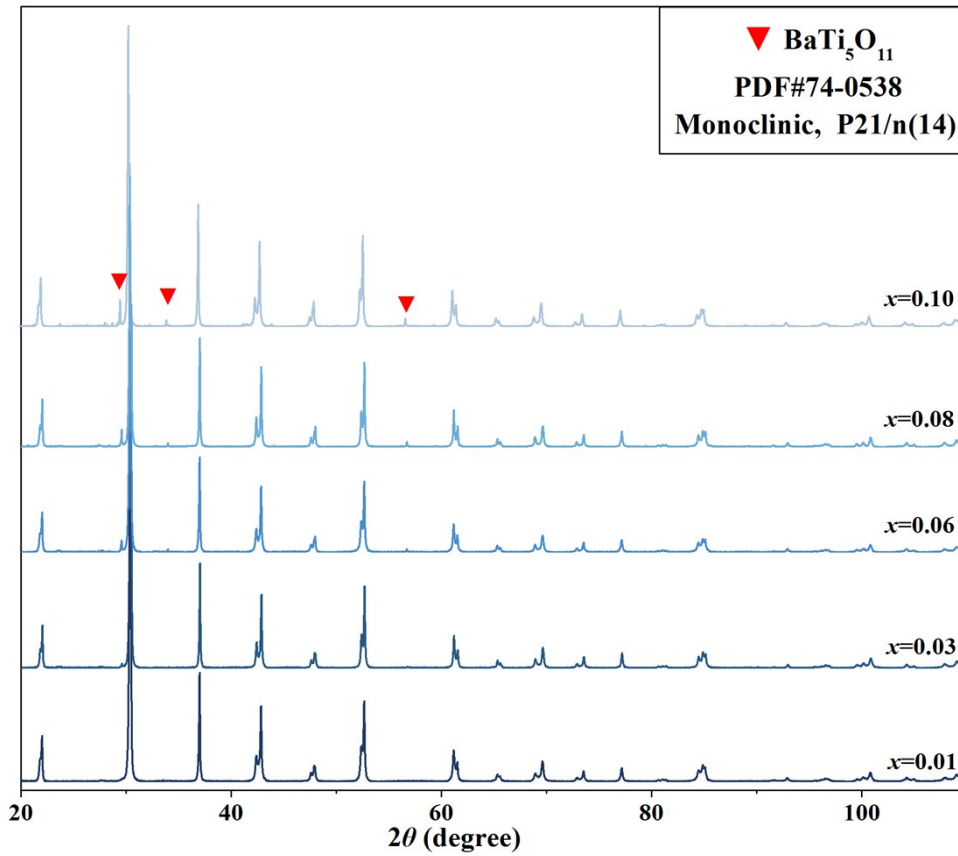

Figure S1 Fine-scan XRD patterns of BT-*x*LH ceramic powders measured at room temperature in the  $2\theta$  ranges of 20-120°.
